# Supplementary material
Source: PubMed Central journal article supplement (PMC187761)

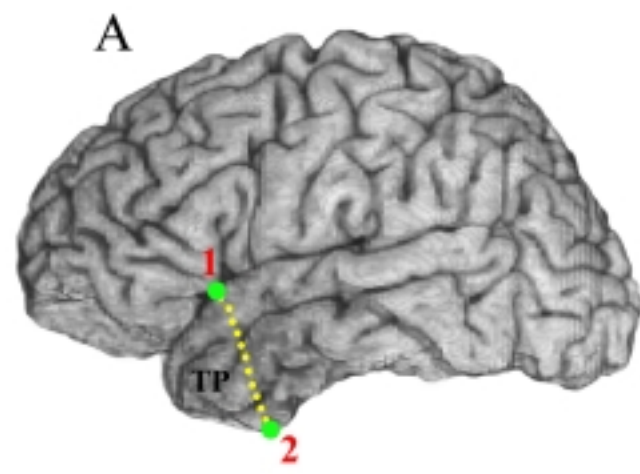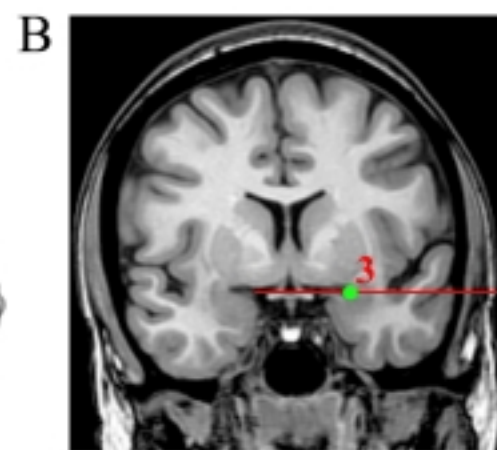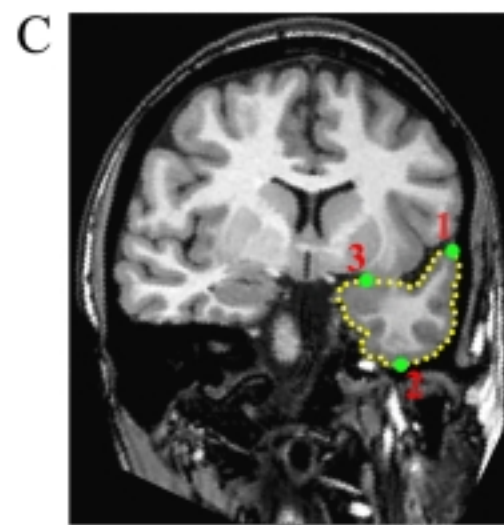

Supplement: pnas_100_17_10049__2.pdf [file pnas_100_17_10049__2.pdf]

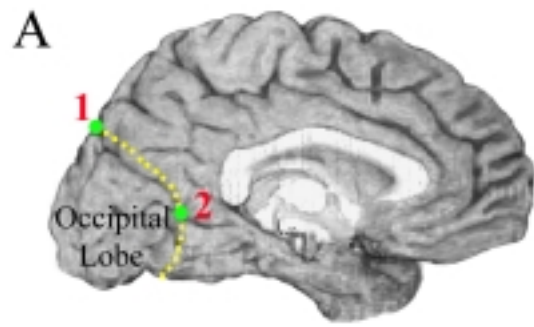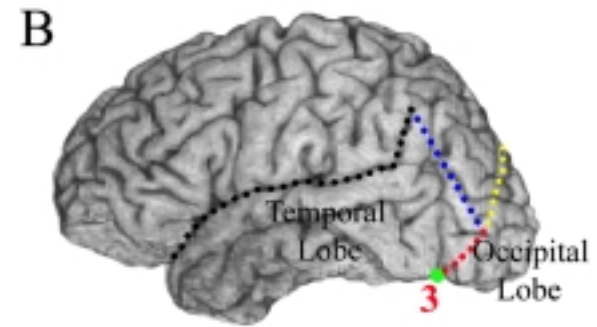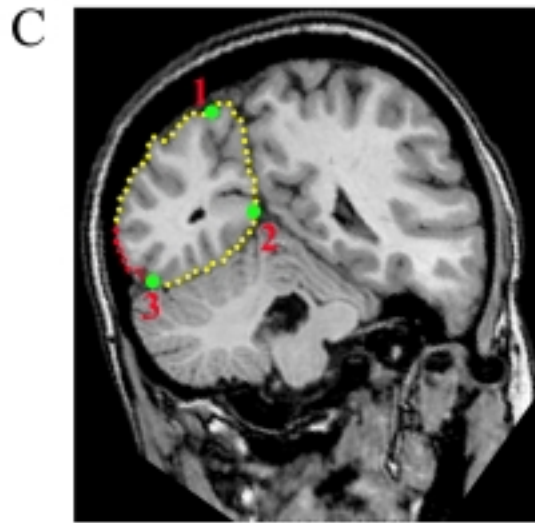

Supplement: pnas_100_17_10049__4.pdf [file pnas_100_17_10049__4.pdf]
